# Supplementary material for: Single-cell transcriptome analysis of cavernous tissues reveals the key roles of pericytes in diabetic erectile dysfunction
Source: eLife. 2024 Jun 10;12:RP88942. doi: 10.7554/eLife.88942 (PMC11164535; doi:10.7554/eLife.88942)
Supplement: Supplementary file 1. [file elife-88942-supp1.xlsx]

## Sheet: Sheet1
			Table S1. Relative density of mouse angiogenesis array spots
			Coordinate	Analyte/Control	Density in Normal	Density in DM	Ratio (normal/DM)
			A1, A2	Reference Spots	40198	39327	0.978332
			A5, A6	ADAMTS1	1355	1155	0.852399
			A7, A8	Amphiregulin	410	543	1.32439
			A9, A10	Angiogenin	5071	6522	1.28614
			A11, A12	Angiopoietin-1	1592	1561	0.980528
			A13, A14	Angiopoietin-3	1283	1153	0.898675
			A15, A16	Coagulation Factor III	25262	23574	0.93318
			A17, A18	CXCL16	1090	1174	1.07706
			A21, A22	Reference Spots	42612	40543	0.951446
			B3, B4	Cyr61	1660	1672	1.00723
			B5, B6	DLL4	427	524	1.22717
			B7, B8	DPPIV	7955	9405	1.18228
			B9, B10	EGF	90	110	1.22222
			B11, B12	Endoglin (CD105)	5743	3330	0.579836
			B13, B14	Endostatin/Collagen XVIII	20887	21221	1.01599
			B15, B16	Endothelin-1	1765	1638	0.928045
			B17, B18	FGF acidic	9771	9275	0.949238
			B19, B20	FGF basic	15057	16760	1.1131
			C3, C4	KGF	118	170	1.44068
			C5, C6	Fractalkine	150	131	0.873333
			C7, C8	GM-CSF	244	300	1.22951
			C9, C10	HB-EGF	363	390	1.07438
			C11, C12	HGF	399	360	0.902256
			C13, C14	IGFBP-1	169	185	1.09467
			C15, C16	IGFBP-2	16754	13118	0.782977
			C17, C18	IGFBP-3	11454	12038	1.05099
			C19, C20	IL-1α	97	94	0.969072
			C21, C22	IL-1β	35	17	0.485714
			D3, D4	IL-10	1058	1150	1.08696
			D5, D6	IP-10	856	845	0.98715
			D7, D8	KC	542	540	0.99631
			D9, D10	Leptin	989	823	0.832154
			D11, D12	MCP-1	857	871	1.01634
			D13, D14	MIP-1α	695	612	0.880576
			D15, D16	MMP-3 (pro and mature form)	1656	7314	4.41667
			D17, D18	MMP-8 (pro form)	326	338	1.03681
			D19, D20	MMP-9 (pro and active form)	1770	1999	1.12938
			D21, D22	NOV (IGFBP-9)	14787	10986	0.74295
			E3, E4	Osteopontin (OPN)	15851	9510	0.599962
			E5, E6	PD-ECGF	304	388	1.27632
			E7, E8	PDGF-AA	1008	1226	1.21627
			E9, E10	PDGF-AB/PDGF-BB	817	1055	1.29131
			E11, E12	Pentraxin-3	852	1065	1.25
			E13, E14	Platelet Factor 4	19577	23907	1.22118
			E15, E16	PlGF-2	625	687	1.0992
			E17, E18	Prolactin	476	550	1.15546
			E19, E20	Proliferin	604	831	1.37583
			F1, F2	Reference Spots	40870	41967	1.02684
			F3, F4	SDF-1	7034	7236	1.02872
			F5, F6	SerpinE1	1395	1096	0.785663
			F7, F8	Serpin F1	36552	38994	1.06681
			F9, F10	Thrombospondin-2 (TSP-2)	13897	7254	0.521983
			F11, F12	TIMP-1	474	884	1.86498
			F13, F14	TIMP-4	158	413	2.61392
			F15, F16	VEGF	292	666	2.28082
			F17, F18	VEGF-B	517	832	1.60928
			F19, F20	Negative Control	15	17	1.13333
