# Supplementary material for: Single-cell transcriptome analysis of cavernous tissues reveals the key roles of pericytes in diabetic erectile dysfunction
Source: eLife. 2024 Jun 10;12:RP88942. doi: 10.7554/eLife.88942 (PMC11164535; doi:10.7554/eLife.88942)
Supplement: Supplementary file 2. — Values are the mean ± SEMs for n=5 animals for each group. STZ, streptozotocin; MSBP, mean systolic blood pressure; NC, lentiviruses ORF control particles; LBH O/E, ORF clone of mouse Lbh lentiviruses, *p<0.05 vs. control group. [file elife-88942-supp2.xlsx]

## Sheet: Sheet1
Table S2. Physiologic and metabolic parameters: 2 weeks after treatment with PBS, NC, Lbh O/E
		STZ-induced diabetic mice (DM)
	Control	PBS	NC	Lbh O/E
Body weight (g)	31.7±1.1	24.1±1.9*	24.9±0.7*	25.3±0.8*
Fasting glucose (mg/dl)	102.6±4.1	549.2±41.7*	559.2±39.1*	548.2±39.9*
Postprandial glucose (mg/dl)	171.2±37.9	588±13.2*	591.2±12.1*	587±13.7*
MSBP (mm Hg)	100.7±5.6	105.8±2.8	100.0±4.4	104.6±4.2
Values are the mean ± SEMs for n=5 animals for each group. STZ, streptozotocin; MSBP, Mean systolic blood pressure; NC, lentiviruses ORF control particles; Lbh O/E, ORF clone of mouse Lbh lentiviruses, *P < 0.05 vs. Control group
